# Supplementary material for: Multimaterial 3D Printing for Arbitrary Distribution with Nanoscale Resolution
Source: MDPI journal article supplement (doi:10.3390/nano9081108), 2019-08-02
Supplement: s1 [file s1]

# Multimaterial 3D Printing for Arbitrary Distribution with Nanoscale Resolution

Fengqiang Zhang <sup>1</sup>, Changhai Li <sup>2,\*</sup>, Zhenlong Wang <sup>1,2,\*</sup>, Jia Zhang <sup>1,2</sup> and Yukui Wang <sup>1</sup>

<sup>1</sup> School of Mechatronics Engineering, Harbin Institute of Technology, Harbin 150001, China

<sup>2</sup> Key Laboratory of Micro-Systems and Micro-Structures Manufacturing, Ministry of Education, Harbin Institute of Technology, Harbin 150080, China

\* Correspondence: lich@hit.edu.cn (C.L.); wangzl@hit.edu.cn (Z.W.); Tel.: +86-451-8641-3485 (Z.W.)

Received: 3 July 2019; Accepted: 30 July 2019; Published: date

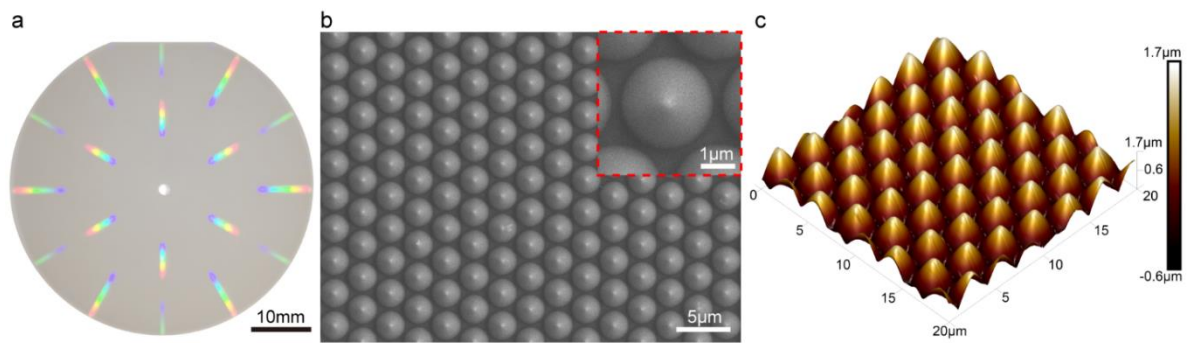

**Figure S1.** Patterned sapphire substrate (PSS). (a) The optical images of PSS illuminated by astigmatism lamp; (b) SEM image of PSS; (c), AFM image of PSS.

**Table S1.** Parameters of magnetron sputtering.

| No. | material | deposition<br>rate of<br>W(Å/s) | sputtering<br>power of<br>W(W) | deposition<br>rate of Al<br>(Å/s) | sputtering<br>power of<br>Al(W) | Deposition<br>time of each<br>layer (s) | Thickness<br>of each<br>layer (nm) |
|-----|----------|---------------------------------|--------------------------------|-----------------------------------|---------------------------------|-----------------------------------------|------------------------------------|
| 1   | W        | 5                               | 59                             |                                   |                                 | 480                                     | 240                                |
| 2   | Al       |                                 |                                | 5                                 | 218                             | 240                                     | 120                                |
| 3   | W        | 5                               | 59                             |                                   |                                 | 240                                     | 120                                |
| 4   | Al       |                                 |                                | 5                                 | 218                             | 240                                     | 120                                |
| 5   | W        | 5                               | 59                             |                                   |                                 | 240                                     | 120                                |
| 6   | Al       |                                 |                                | 5                                 | 218                             | 240                                     | 120                                |
| 7   | W        | 5                               | 59                             |                                   |                                 | 240                                     | 120                                |
| 8   | Al       |                                 |                                | 5                                 | 218                             | 240                                     | 120                                |
| 9   | W        | 5                               | 59                             |                                   |                                 | 240                                     | 120                                |
| 10  | Al       |                                 |                                | 5                                 | 218                             | 240                                     | 120                                |
| 11  | W        | 5                               | 59                             |                                   |                                 | 240                                     | 120                                |
| 12  | Al       |                                 |                                | 5                                 | 218                             | 240                                     | 120                                |
| 13  | W        | 5                               | 59                             |                                   |                                 | 240                                     | 120                                |
| 14  | Al       |                                 |                                | 5                                 | 218                             | 240                                     | 120                                |
| 15  | W        | 5                               | 59                             |                                   |                                 | 240                                     | 120                                |
| 16  | Al       |                                 |                                | 5                                 | 218                             | 240                                     | 120                                |
| 17  | W        | 5                               | 59                             |                                   |                                 | 240                                     | 120                                |
| 18  | Al       |                                 |                                | 5                                 | 218                             | 240                                     | 120                                |
| 19  | W        | 5                               | 59                             |                                   |                                 | 240                                     | 120                                |
| 20  | Al       |                                 |                                | 5                                 | 218                             | 240                                     | 120                                |
| 21  | W        | 5                               | 59                             |                                   |                                 | 240                                     | 120                                |
| 22  | Al       |                                 |                                | 5                                 | 218                             | 240                                     | 120                                |
| 23  | W        | 5                               | 59                             |                                   |                                 | 240                                     | 120                                |

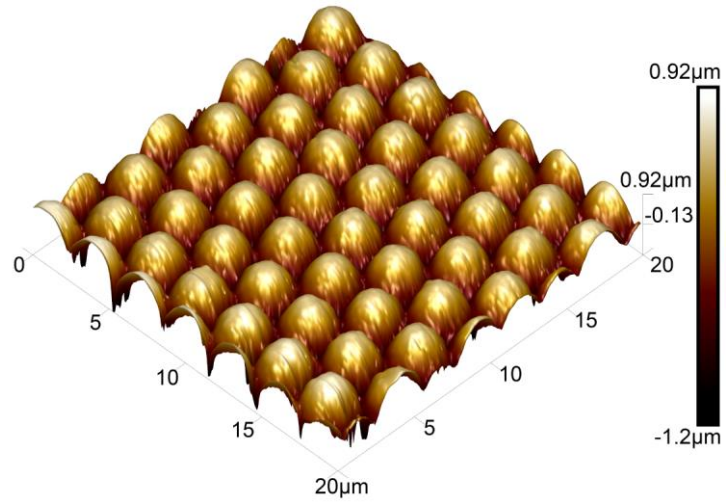

**Figure S2.** AFM image of lamination of multimaterials. Good uniformity of microstructures of lamination is demonstrated.

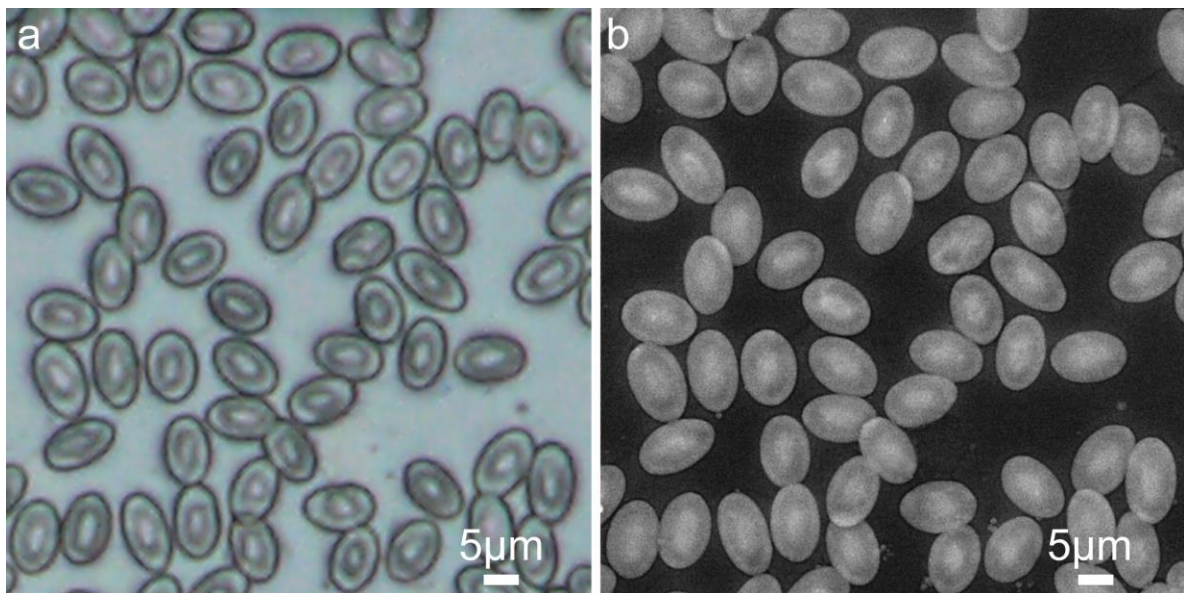

**Figure S3.** Comparison of the morphology of monolayer cells and the distribution of multiple materials; (a) Optical image of deposition surface formed by spin-coating of the erythrocytes on a quartz substrate; (b) SEM image of the distribution on the specified section via depositing gradient ratios of aluminum and tungsten metals on the deposition surface.
